# Supplementary material for: Convergence Rates for Hestenes’ Gram–Schmidt Conjugate Direction Method without Derivatives in Numerical Optimization
Source: MDPI journal article supplement (doi:10.3390/appliedmath3020015), 2023-03-24
Supplement: s1 [file s1]

```
> # On March 15, 2023, Ivie Stein Jr. using MAPLE 2022 programmed
Newton's method for  $\text{grad}(F)=0$  where  $F$  is Rosenbrock's Banana
Valley Function. Refer to the end of this MAPLE computer program
to verify quadratic convergence. The results are the same as
those of the CGS method of Hestenes with no derivatives and no
line searches for function minimization.
```

```
> restart;
```

```
> Digits:=150;
```

*Digits := 150*

(1)

```
> with(Student[LinearAlgebra]):
```

```
> x:=<-1.2,1>:
```

```
for i from 1 to 9 do
```

```
Jacobian:=<-400*(x[2]-x[1]^2)+800*x[1]^2+2,-400*x[1];-400*x[1],
200>:
```

```
Jacobian^(-1):
```

```
x:=x-(Jacobian^(-1)).<-400*x[1]*x[2]+400*x[1]^3+2*(x[1]-1),200*(x
[2]-x[1]^2)>:
```

```
print(x[1],x[2]):
```

```
y[i,1]:=x[1];y[i,2]:=x[2];
```

```
end do:
```

```
-1.17528089887640449438202247191011235955056179775280898876404494382022471910112\ (2)
359550561797752808988764044943820224719101123595505617977528089887640450,
1.380674157303370786516853932584269662921348314606741573033707865168539325842\
69662921348314606741573033707865168539325842696629213483146067415730337079
0.7631148711764698446887391435696941428681579682501159746739120817169560661390609\
021881608502365630541977758395997578120161138435207762150164134184105,
-3.1750338547481955238341997685008737921012068652007649677135000968402552208\
3448391941180775639244037286928181798182010794553238770034879676994821556248
0.7634296788840740867449241049647925404753966074277955085878739215818558932898646\
48236467479595449558836941215019378442329996188184332237589042947560453,
0.582824775497147708487268219815099320525790412676089108814007944328038145710\
58365086719420027568190171257343500711854243750403623779946717569010962391
0.9999953110849907987615066898161573229094884153091870873228268948292979487421585\
48461094883962292472279813795962719155203829111838088249239690058524891,
0.944027323853348119531028797598028624487126114932192014496159164458585814202\
469387234648854261116208872571063865963349935045169772287889689731512143422
0.9999956956536687561741244552731308256429981938650793344283312651115690473479582\
85972478761280306144137266926396221847868377683882850113483819014524771,
0.999991391325717016619475181995497741905179815905028647428144824220165871054\
096376355700816030461107979943954223099673401965269556580526937985645714462
0.9999999999999998726834030145853820832656956709285893579292035805667023399040318\
31249895065307315038424815851729603973839861090368769626987827630247944,
0.999999999981472348028609875038378336326100680138963923102325279809701030007\
```

[illegible]
