# Supplementary material for: Convergence Rates for Hestenes’ Gram–Schmidt Conjugate Direction Method without Derivatives in Numerical Optimization
Source: MDPI journal article supplement (doi:10.3390/appliedmath3020015), 2023-03-24
Supplement: s1 [file s1]

```
> # NAME OF MAPLE PROGRAM: Gram Schmidt Conjugate Direction Method
Mar 15 2023.mws Programmed by Ivie Stein Jr. This method is also
called CGS -- no derivatives by Magnus R. Hestenes. No
derivative evaluations and no line searches are used. THE
QUOTIENT CONVERGENCE FACTOR FOR THIS PROBLEM IS COMPUTED AT THE
END OF THIS COMPUTER PROGRAM SHOWING QUADRATIC CONVERGENCE. When
the output for the iterations is compared with that of Newton's
method, the results agree to approximately 150 significant
figures. The function for minimization to which CGS is applied
is Rosenbrock's banana valley function. The main idea here to
show how to implement CGS and to see quadratic convergence
numerically, which is what Hestenes states on p. 202 that CGS has
Newton's algorithm as its limit.
```

```
> #
```

```
> # References: CGS [CONJUGATE GRAM-SCHMIDT -- NO DERIVATIVES,
FUNCTION EVALUATIONS WITH NO LINE SEARCHES] Algorithms for
Unconstrained Minimization of Functions, R. F. Denneweyer and E.
H. Mookini, Communicated by M. R. Hestenes, Journal of
Optimization Theory and Applications, Vol. 16, Nos. 1/2, 1975,
pp.67-85. Particular attention should be called to pp. 75-76,
the CGS-F [CONJUGATE GRAM-SCHMIDT - FUNCTION EVALUATION ONLY]
Algorithm. Also see Conjugate Direction Methods in Optimization
by Magnus R. Hestenes, Springer-Verlag, New York, 1980, pages 198
-202.
```

```
> restart: Digits:=400;
```

```
Digits := 400 (1)
```

```
> sigma:=.1e-120; rho:=2*sigma; epsilon:= .1e-60;
```

```
 $\sigma := 1. 10^{-121}$  (2)
```

```
 $\rho := 2. 10^{-121}$ 
```

```
 $\epsilon := 1. 10^{-61}$ 
```

```
> u[1,1]:=1; u[1,2]:=0;u[2,1]:=0; u[2,2]:=1;
```

```
 $u_{1,1} := 1$  (3)
```

```
 $u_{1,2} := 0$ 
```

```
 $u_{2,1} := 0$ 
```

```
 $u_{2,2} := 1$ 
```

```
> p[1,1]:=u[1,1];p[1,2]:=u[1,2];
```

```
 $p_{1,1} := 1$  (4)
```

```
 $p_{1,2} := 0$ 
```

```
> f:=(x1,x2)->100*(x2-x1^2)^2+(x1-1)^2;
```

(5)

$$f := (x1, x2) \rightarrow 100 (x2 - x1^2)^2 + (x1 - 1)^2 \quad (5)$$

$$\begin{aligned} > \text{ x[1,1]} := -1.2; \text{ x[1,2]} := 1; \\ & \quad x_{1,1} := -1.2 \\ & \quad x_{1,2} := 1 \end{aligned} \quad (6)$$

```

> for j from 1 to 10 do
  c[1] := (f(x[1,1]-sigma*p[1,1], x[1,2]-sigma*p[1,2]) - f(x[1,1]+sigma*
p[1,1], x[1,2]+sigma*p[1,2])) / (2*sigma):
  d[1] := (f(x[1,1]-sigma*p[1,1], x[1,2]-sigma*p[1,2]) - 2*f(x[1,1], x[1,
2]) + f(x[1,1]+sigma*p[1,1], x[1,2]+sigma*p[1,2])) / (sigma)^2:
  a[1] := c[1]/d[1]:
  x[2,1] := x[1,1] + a[1]*p[1,1]:
  x[2,2] := x[1,2] + a[1]*p[1,2]:
  for i from 1 to 2 do x[2,i] := x[1,i] + a[1]*p[1,i] end do:
  c[2,1] := (f(x[1,1]+rho*u[2,1]-sigma*p[1,1], x[1,2]+rho*u[2,2]-
sigma*p[1,2]) - f(x[1,1]+rho*u[2,1]+sigma*p[1,1], x[1,2]+rho*u[2,2]+
sigma*p[1,2])) / (2*sigma):
  a[2,1] := c[2,1]/d[1]:
  b[2,1] := (a[2,1] - a[1]) / rho:
  for i from 1 to 2 do pbar[2,i] := u[2,i] + b[2,1]*p[1,i] end do:
  for i from 1 to 2 do p[2,i] := pbar[2,i] / sqrt((pbar[2,1])^2 + (pbar
[2,2])^2) end do:
  for k from 2 to 2 do c[k] := (f(x[1,1]-sigma*p[k,1], x[1,2]-sigma*p
[k,2]) - f(x[1,1]+sigma*p[k,1], x[1,2]+sigma*p[k,2])) / (2*sigma) end
do:
  for k from 2 to 2 do c[k] := (f(x[1,1]-sigma*p[k,1], x[1,2]-sigma*p
[k,2]) - f(x[1,1]+sigma*p[k,1], x[1,2]+sigma*p[k,2])) / (2*sigma) end
do:
  for k from 2 to 2 do d[k] := (f(x[1,1]-sigma*p[k,1], x[1,2]-sigma*p
[k,2]) - 2*f(x[1,1], x[1,2]) + f(x[1,1]+sigma*p[k,1], x[1,2]+sigma*p[k,
2])) / (sigma)^2 end do:
  for k from 2 to 2 do a[k] := c[k]/d[k] end do:
  for i from 1 to 2 do x[3,i] := x[2,i] + a[2]*p[2,i] end do:
  for i from 1 to 2 do x[1,i] := x[3,i] end do:
  print(x[3,1], x[3,2]);
  y[j,1] := x[3,1]; y[j,2] := x[3,2];
end do:

```

— 1.17528089887640449438202247191011235955056179775280898876404494382022471910112\ (7)  
35955056179775280898876404494382022471910112359550561797752808988764044943820\  
22503613562241339799575017784196302955476385899599063106706626632095624545653\  
06481440912509674639864703902575382355071454879441452007444547473807797479062\

35618441949262944975896458455851122216287475505232210241299452964640695067083\  
56491638996898,

1.380674157303370786516853932584269662921348314606741573033707865168539325842\  
69662921348314606741573033707865168539325842696629213483146067415730337078651\  
68540204292453770456946557784437105894391324859301390706914996112930982930119\  
13700423258627455568146251170633859552755104895618003617537736677077394425935\  
53630654254104460392508629163721698814780418650644741743039001930576900532558\  
6801449328372258

0.7631148711764698446887391435696941428681579682501159746739120817169560661390609\  
02188160850236563054197777583959975781201611384352077621501641341842777527082\  
84576257258681853118195767247395910460060620655309072418365701712184963688776\  
35999177608224818720005177570281680376743097317477007712615783915055152076815\  
80441742594673275864004043082957236491204621160197615406251896359520755903086\  
352507102063,

— 3.1750338547481955238341997685008737921012068652007649677135000968402552208\  
34483919411807756392440372869281817981820107945532387700348796769948215566507\  
53961002963181137959290300310588461077476174913565471092687955391203253653470\  
45925097156209584117261824180279987933689510824605710643521170067137188632515\  
39128394855306977708730286312891017448991808947951876712129276272999780200976\  
346502684615559282

0.7634296788840740867449241049647925404753966074277955085878739215818558932898646\  
48236467479595449558836941215019378442329996188184332237589042947562178611247\  
08563696326106774332978165931611460294096586031460547937904030441712324297156\  
46937637998196479115928865942521268165961916164900456756254576486985904708520\  
71721518147564582235542158000708296239079263960692457572668438292645990321367\  
3346318782139,

0.582824775497147708487268219815099320525790412676089108814007944328038145710\  
58365086719420027568190171257343500711854243750403623779946717569010962653351\  
85282980738368284232652229710786326669476018550647758367487831816487663818746\  
02807356643487736475446775649129185190067172853689877735445318534887743893028\  
57426119577429182623311943472947094410182965667318856608219036548737067688960\  
9811901121737938

0.9999953110849907987615066898161573229094884153091870873228268948292979487421585\  
48461094883962292472279813795962719155203829111838088249239690058524891845110\  
29880024890313568647201222275451898214644349487629814001057566983312361687664\  
09303764009905664962464446765472169220047163916015187524299869000249459547494\  
51352135977151457488000253645073938134095161381673187240261467015077413947471\  
7166787959216,

0.944027323853348119531028797598028624487126114932192014496159164458585814202\  
46938723464885426111620887257106386596334993504516977228788968973151214424341\  
44112669698389821472820137908219600923854906727442416443243872055468976372544\  
49218574997383506733273452771934032037798325417752059320932766728029932327734\  
45008027451375641732317944042227754725322575592683612243753332271656373475619\  
72815346677143635

0.9999956956536687561741244552731308256429981938650793344283312651115690473479582\  
85972478761280306144137266926396221847868377683882850113483819014524775114529\  
29859298093936947598183076534760125766703829761994918129565100354498415031892\  
95114378662274180217719279928888565170531285363971528609488687099833629276689





0.7634296788840740867449241049647925404753966074277955085878739215818558932898646\  
48236467479595449558836941215019378442329996188184332237589042947562178611247\  
08563696326106774332978165931611460294096586031460547937904030441712324297156\  
46937637998196479115928865942521268165961916164900456756254576486985904708520\  
71721518147564582235542158000708296239079263960692457572668438292645990321367\  
3346318782139,  
0.582824775497147708487268219815099320525790412676089108814007944328038145710\  
58365086719420027568190171257343500711854243750403623779946717569010962653351\  
85282980738368284232652229710786326669476018550647758367487831816487663818746\  
02807356643487736475446775649129185190067172853689877735445318534887743893028\  
57426119577429182623311943472947094410182965667318856608219036548737067688960\  
9811901121737938  
0.9999953110849907987615066898161573229094884153091870873228268948292979487421585\  
48461094883962292472279813795962719155203829111838088249239690058524891845110\  
29880024890313568647201222275451898214644349487629814001057566983312361687664\  
09303764009905664962464446765472169220047163916015187524299869000249459547494\  
51352135977151457488000253645073938134095161381673187240261467015077413947471\  
7166787959216,  
0.944027323853348119531028797598028624487126114932192014496159164458585814202\  
46938723464885426111620887257106386596334993504516977228788968973151214424341\  
44112669698389821472820137908219600923854906727442416443243872055468976372544\  
49218574997383506733273452771934032037798325417752059320932766728029932327734\  
45008027451375641732317944042227754725322575592683612243753332271656373475619\  
72815346677143635  
0.9999956956536687561741244552731308256429981938650793344283312651115690473479582\  
85972478761280306144137266926396221847868377683882850113483819014524775114529\  
29859298093936947598183076534760125766703829761994918129565100354498415031892\  
95114378662274180217719279928888565170531285363971528609488687099833629276689\  
88589142801968027622357854953413863788408458423891310793457644297835828602599\  
4227199396050,  
0.999991391325717016619475181995497741905179815905028647428144824220165871054\  
09637635570081603046110797994395422309967340196526955658052693798564571446526\  
84426745784296749593953887996444053602723838402306065754549784332819671821247\  
70744120275866543211422348141293569772240172329614182101303423087160933218452\  
44821739825652618147118940943882493877595026526844033210954337388851359257296\  
61805784343022148  
0.999999999999998726834030145853820832656956709285893579292035805667023399040318\  
31249895065307315038424815851729603973839861090368769626987827630247445158577\  
59876794923740557834304752288475454986724363375867557526757324058558948687511\  
33049328200476984562375738103487300285520799853946958634974014577529925560642\  
20493107475755844857232611911512959204796007446148441273061885449014663956097\  
9264941558741,  
0.999999999981472348028609875038378336326100680138963923102325279809701030007\  
27132696619779677893176988575691573434138036857939680945461713986870554507588\  
11406392400161310017770421872889039029944786513751089123887130757003465088804\  
29306803998770646686458085473307445547986357251653023994529050266995393463271\  
75138563901054473857424975858506852874838039794661058618262409691709531500078\  
77429961718251350





93111647745448873

$C_2 :=$

0.027425130438364097620270274217476994762518963582663672985255783215200992507\  
19884464293524593479024407381310820803401760938509862650665811324134056298470\  
47313476456156937315679558786904877105416286775081213644518654625726580741017\  
28886075589853832001074612067868128814587935978298755666846430444119344799806\  
98416384974341032353194261891417421391298291640353445083896721606033116051759\  
463356366318470857

$C_3 :=$

0.243358737816634476633217331721661896450224179196904251999352730424530646180\  
31209366938666888880546068726628944158798115770435015107404261837077681740520\  
45429477944800281603629271196798498255346125144501232623650571267233330277882\  
06271601458711076013231459046153818055786555937815591421555060833715876516522\  
08441343894441770115760878373346810013672008713231619555599060938894429720207\  
22950957776429992

$C_4 :=$

0.003072128106308615888405711344279275434814754379593169704867753514746095627\  
98846240992211480165226640288552827299393910864964814530967100693027333038672\  
07345615088552450551008205596404264969965760805827846764810583149350659995172\  
41102704965799920339594916641746283342909940420746794181901141117320411372133\  
62755854371314033405797552580901763100891309986532510522973555603260456991179\  
6255884066720425407

$C_5 :=$

0.200003431922459950256471785706353810769220192560188412334857952065068067593\  
22807640285512126724041821853950969628127936307613622462784302278218789818939\  
10593261096956135330955780471003188300634552966385745558435031061708573718226\  
19845795670551371039962793505544678715492783644187511421816391846910957749950\  
24873156499153523932697552739745688678889020061809629859165924384976522438873\  
55663505505196182

$C_6 :=$

0.003073078620154734024892873706166077595872592334348578513333756660225914172\  
84808086671688166183589202179737835168731275897016114386900850712873241117706\  
75127330662072275333800569352616326531059049439056549248224515302572183435239\  
11371758913784083963831260476016994066616079413473236139081683737389463740726\  
11358831797918831084820807892626845972562376789228153217639536671615098696831\  
3538097816203323889

$C_7 :=$

0.200002743227798855116382362078394254202652448054693087397984449514382900750\  
89145509919809959230317291822138097655134257807508027233627718494472294846840\  
26567655850692489191770848255933023594876391696451343564374057072179265682266\  
68036902221108441932191528338487290954477833751770339217467379549511201482277\  
46651243631772036480091428824323023266769700268163489338356394497616531343316\  
39721406905156624

$C_8 :=$

0.003073078620155047024789758428115754357016949631220064330594458932209288413\  
99028747312704929157030570036482504607544652537080925753069133944106462206597



```
15805277884032763293018465854964621162201429124439854794419968659904076809842\  
31281495602590949178330733239813033789280707946848577277513246541229946918588\  
34083133080486680955337373003308403974956824502233077524609999169653868642531\  
6376695332088012783
```

$C_9 :=$

```
0.200002743227798855116382286595610991991526131271160237621401642080560413582\  
25555040330624632509950478307204018097489809436811770271829742265615944959218\  
94730752929485771974946276308901292227253515285109866313592125428522736176976\  
31537460625887541698749112692490384107843882468587424521932899224993960454145\  
55549399951790530419826777579687779300944629154036523425807480039852746385393\  
84401008455818819
```

>

*# THE QUOTIENT CONVERGENCE FACTOR OF ORTEGA AND RHEINBOLDT, P.  
281, IS  $Q_2\{y_n\} = 0.200002743227798855116382 \dots$ ; REFER TO  $C_9$  ABOVE;  
THIS INDICATES QUADRATIC CONVERGENCE OF CGS FOR THIS PROBLEM;  
THE RESULTS AGREE WITH THE NEWTON METHOD APPLIED TO THE  $\text{GRAD}(F) = 0$ ,  
WHERE  $F$  IS THE FUNCTION TO BE MINIMIZED.*

>
